# Supplementary material
Source: publisher figshare collection journal article supplement (https://gsajournals.figshare.com/articles/dataset/_/13048073)
Supplement: Supplementary file 2 [file 1]

**Figure S23: Photomorbidity of different combinations of excitation light in *S. cerevisiae***

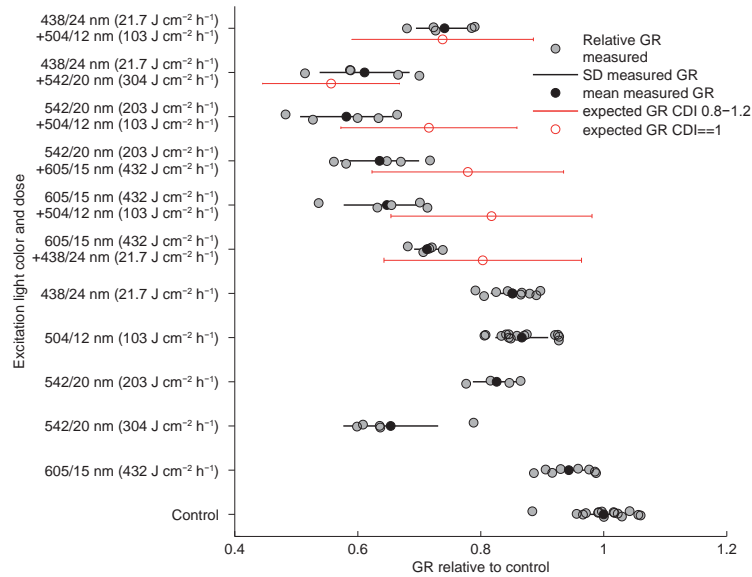

Light doses above the single-color NOEL were applied. The growth rate was measured for single color illumination and pairwise combinations of different wavelengths (gray dots indicate measured values). An additive model was used to calculate the expected growth rate for double color illumination in case the CDI is 1 (red dots) and for CDIs ranging from 0.8-1.2 (red lines) from the measured growth rates of the corresponding single color illuminations.
