# Supplementary material
Source: publisher figshare collection journal article supplement (https://gsajournals.figshare.com/articles/dataset/_/13048073)
Supplement: Supplementary file 3 [file 1]

**Figure S9: Sensitivity of *S. pombe* to teal light (504/12 nm) administered at different imaging intervals**

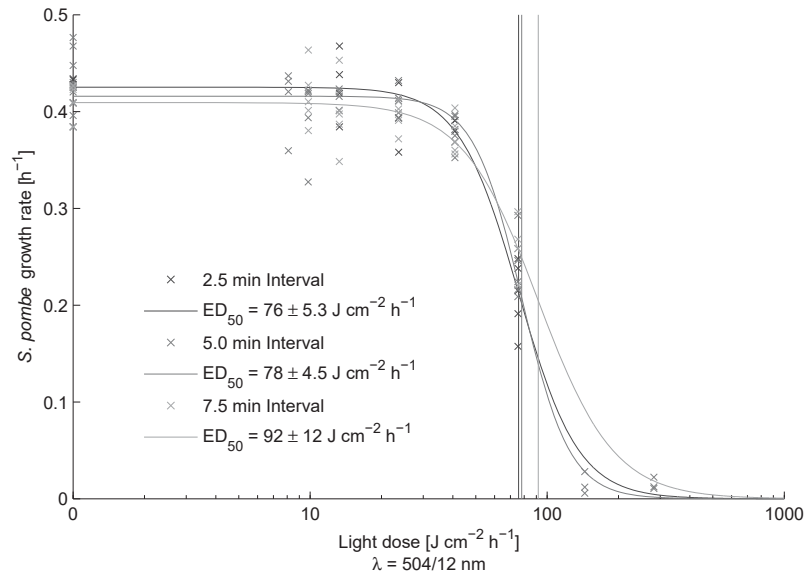

Cells were illuminated with fluorescence excitation light at the indicated intervals for 495 minutes. The light dose was altered by changing the exposure time, while keeping the light intensity and imaging interval constant for a given dose-response curve measurement. Each point represents a single measurement. Lines indicate the fit of the sigmoidal model. ED<sub>50</sub>-values are indicated by vertical lines. Model fit parameters are given with ± 95% confidence interval.
