# Supplementary material
Source: publisher figshare collection journal article supplement (https://gsajournals.figshare.com/articles/dataset/_/13048073)
Supplement: Supplementary file 4 [file 1]

**Table S9: Yeast strains used in this study**

| Name    | Description  | Genotype                            | Source       |
|---------|--------------|-------------------------------------|--------------|
| FRSP902 | 972          | h-                                  | <sup>a</sup> |
| FRY1455 | FY4 / yRG403 | MATa                                | <sup>b</sup> |
| FRY1935 |              | FRY1455, Whi5-CitrineA206K::KanMX   | this study   |
| FRY2002 |              | FRY1455, Whi5-mRuby2::KanMX         | this study   |
| FRY2005 |              | FRY1455, Vph1-mTFP1::KanMX          | this study   |
| FRY2007 |              | FRY1455, Vph1-mAmetrine::KanMX      | this study   |
| FRY2011 |              | FRY1455, Vph1-CitrineA206K::KanMX   | this study   |
| FRY2015 |              | FRY1455, Vph1-mRuby2::KanMX         | this study   |
| FRY2017 |              | FRY1455, Vph1-mKate2::KanMX         | this study   |
| FRY2018 |              | FRY1455, Vph1-tdKO $\kappa$ ::KanMX | this study   |
| FRY2022 |              | FRY1455, Whi5-mKate2::KanMX         | this study   |
| FRY2023 |              | BY4700, BY4707                      | this study   |
| FRY2032 |              | MATa                                | this study   |
| FRY2080 |              | FRY1455, Vph1-mNeongreen::KanMX     | this study   |
| FRY2121 |              | FRY1455, Vph1-sfGFP::KanMX          | this study   |
| FRY2124 |              | FRY1455, Vph1-mCardinal::KanMX      | this study   |
| FRY2127 |              | FRY1455, Vph1-mTurquoise2::KanMX    | this study   |
| FRY2134 |              | FRY1455, Vph1-mNeptune2::KanMX      | this study   |
| FRY2136 |              | FRY1455, Vph1-eGFP::KanMX           | this study   |
| FRY2138 |              | FRY1455, Vph1-mKO $\kappa$ ::KanMX  | this study   |
| FRY2140 |              | FRY1455, Vph1-tSapphire::KanMX      | this study   |
| FRY2142 |              | FRY1455, Cdc12-mKate2::KanMX        | this study   |
| FRY2145 |              | FRY1455, Cdc12-CitrineA206K::KanMX  | this study   |
| FRY2148 |              | FRY1455, Cdc12-mRuby2::KanMX        | this study   |

<sup>a</sup> Leupold, U. "Die Vererbung von Homothallie und Heterothallie bei *Schizosaccharomyces pombe*", C. R. Trav. Lab. Carlsberg Ser. Physiol. 24, 381–480 (1950)

<sup>b</sup> Gnuegge, R., Liphardt, T. & Rudolf, F. "A shuttle vector series for precise genetic engineering of *Saccharomyces cerevisiae*", Yeast 33, 83–98 (2016)
