# Supplementary material
Source: publisher figshare collection journal article supplement (https://gsajournals.figshare.com/articles/dataset/_/13048073)
Supplement: Supplementary file 6 [file 1]

Figure S13: Sensitivity of *S. cerevisiae* to teal light when imaged through 60x objective

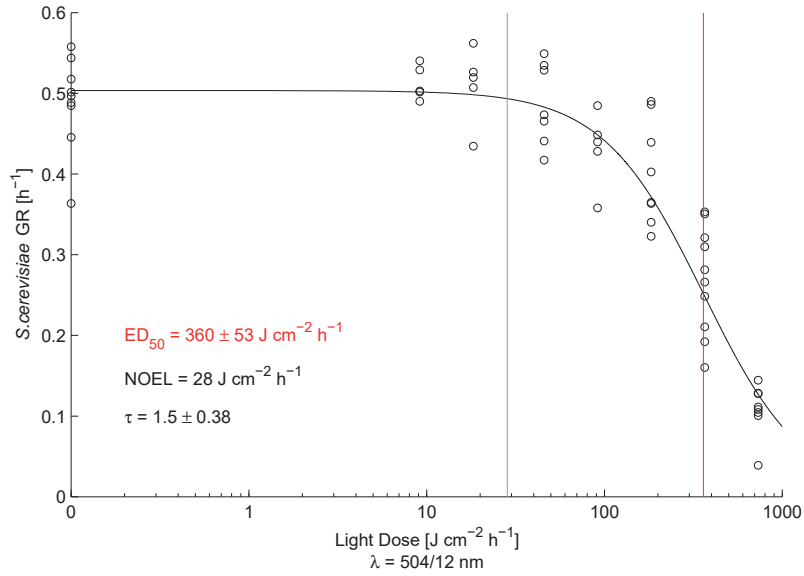

Sensitivity of *S. cerevisiae* to teal light (504/12 nm) when imaged through a Plan Apo VC 60x NA 1.4 oil immersion objective. Cells were illuminated with fluorescence excitation light every five minutes for 495 minutes. The light dose was altered by changing the exposure time, while keeping the light intensity ( $7.63 \text{ W cm}^{-2}$ ) and imaging interval constant for a given dose-response curve measurement. Each point represents a single measurement. The black line indicates the fit of the sigmoidal model. The  $ED_{50}$ -value and NOEL are indicated by red and grey vertical lines. Model fit parameters are given with  $\pm 95\%$  confidence interval.
