# Supplementary material
Source: publisher figshare collection journal article supplement (https://gsajournals.figshare.com/articles/dataset/_/13048073)
Supplement: Supplementary file 7 [file 1]

**Figure S22: Background fluorescence of wildtype *S.cerevisiae* cells with different filter sets**

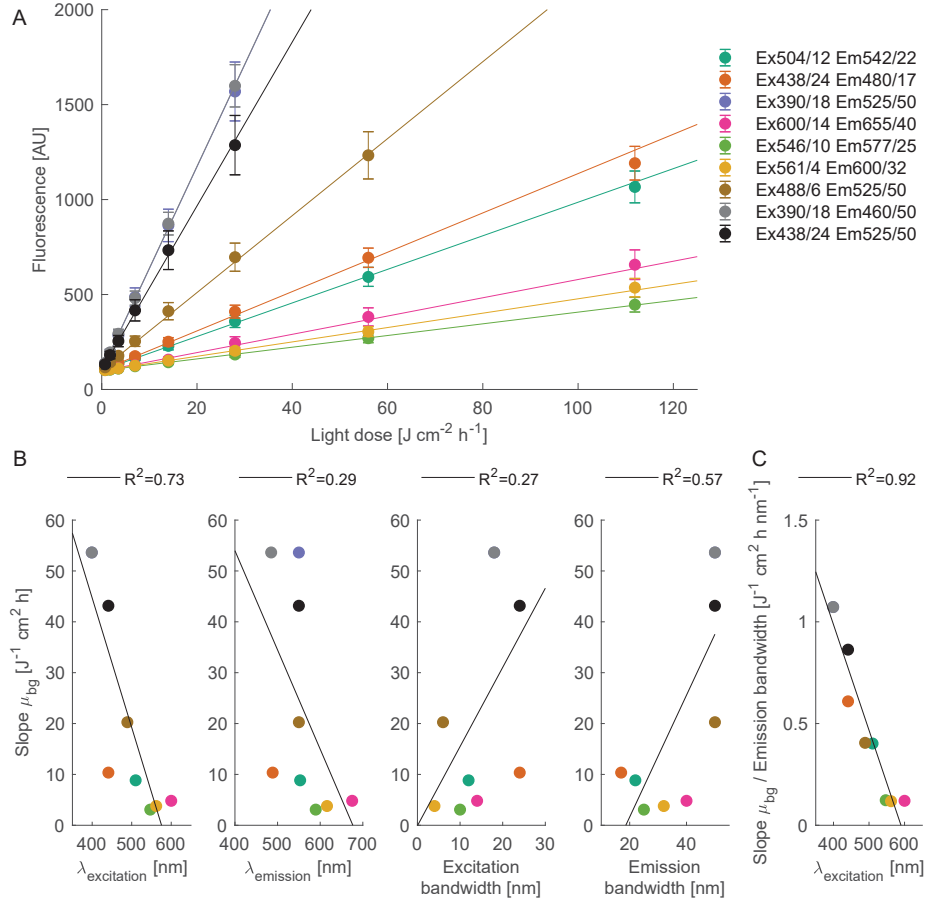

The fluorescence signal from a wildtype *S.cerevisiae* strain (FRY2032) was measured for each fluorescence imaging filter set at different exposure times. A: The background fluorescence of the wildtype strain  $\mu_{bg}$  is plotted against the light dose (mean  $\pm$  standard deviation are shown, light dose based on 5 min interval time).  $\mu_{bg}$  is linearly correlated with the light dose. The slope of the linear fit is a measure for the strength of the background fluorescence B:  $\mu_{bg}$  is plotted against different properties of the imaging channels. C: The background fluorescence corrected for the bandwidth of the emission filter strongly correlates with the excitation wavelength.
