# Supplementary material
Source: publisher figshare collection journal article supplement (https://gsajournals.figshare.com/articles/dataset/_/13048073)
Supplement: Supplementary file 8 [file 1]

Figure S5: Spectra of light sources

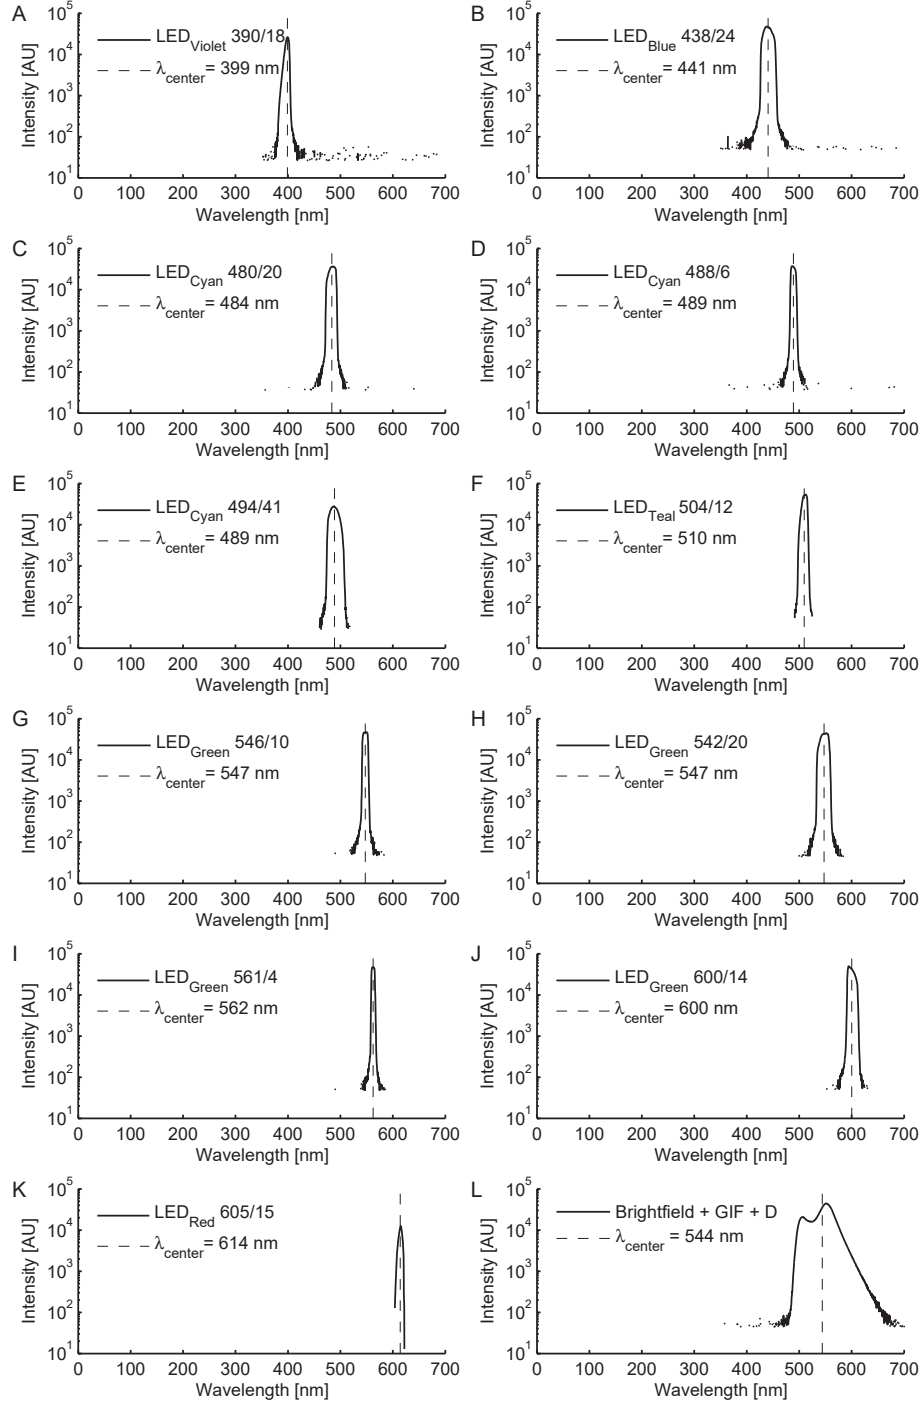

The spectra of the fluorescence excitation light source (Lumencore SpectraX LightEngine) and the brightfield lightsource (pE-100 LED) were measured and subtracted from the dark noise spectra of the photometer. The used bandpass filter and the calculated centre wavelength of the spectrum ( $\lambda_{center}$ ) is indicated in the legend of each panel. The centre wavelength was subsequently used for calibration of the light power meter.
