# Supplementary material
Source: publisher figshare collection journal article supplement (https://gsajournals.figshare.com/articles/dataset/_/13048073)
Supplement: Supplementary file 10 [file 1]

**Figure S15: Sensitivity of *S. cerevisiae* to light in different culturing media**

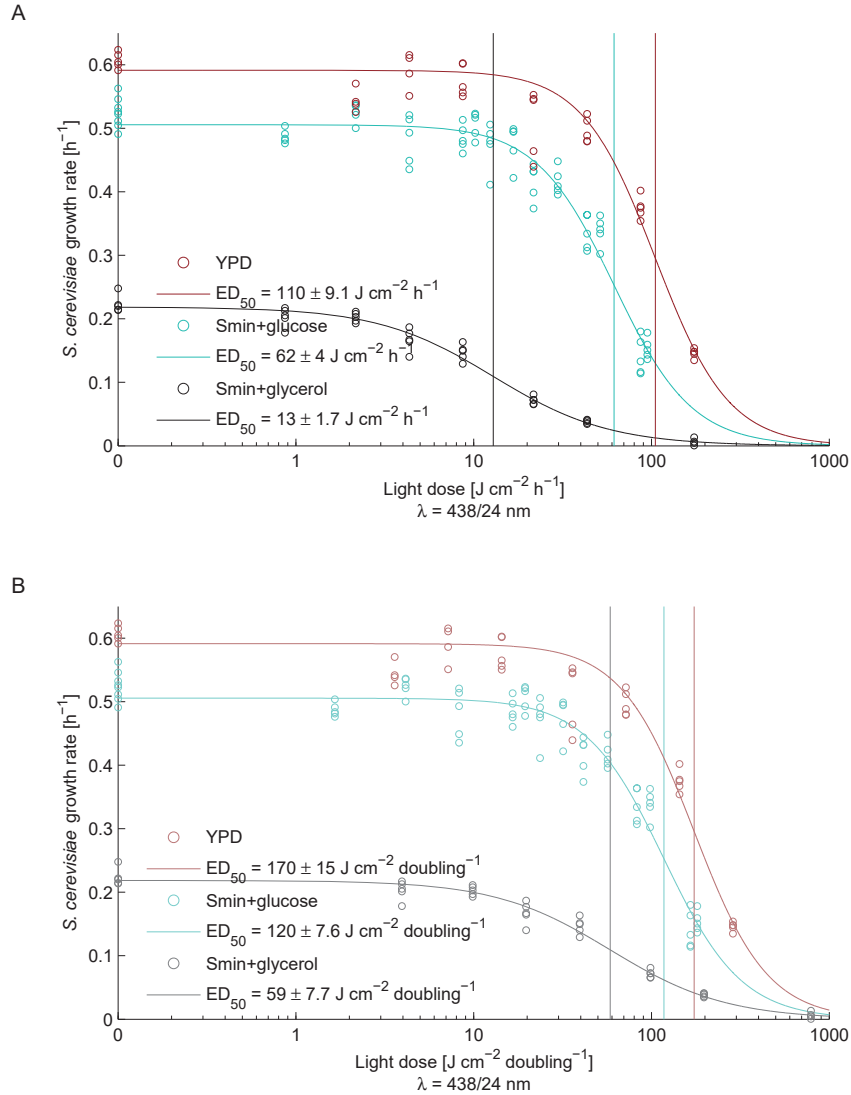

Sensitivity of *S. cerevisiae* to blue light (438/24 nm) in different culturing media. Cells were cultured using YPD, Smin+glucose or Smin+glycerol and illuminated with different light doses every five minutes for 495 minutes. The light dose was altered by changing the exposure time while keeping the light intensity constant. Each point represents a single measurement. A: The growth rate is plotted against the light dose per hour. Lines indicate fit of the sigmoidal model.  $\text{ED}_{50}$ -values are indicated by vertical lines. Model fit parameters are given with  $\pm$  confidence interval. B: The growth rate is plotted against the light dose per unstressed doubling time calculated based on the average doubling time at the respective growth media if cells were not exposed to fluorescence excitation light ( $0 \text{ J cm}^{-2} \text{h}^{-1}$ ). Line indicate fit of the sigmoidal model.  $\text{ED}_{50}$ -values are indicated by vertical lines. Model fit parameters are given with  $\pm$  confidence interval.
