# Supplementary material
Source: publisher figshare collection journal article supplement (https://gsajournals.figshare.com/articles/dataset/_/13048073)
Supplement: Supplementary file 11 [file 1]

**Table S1: Light power of standard epifluorescence light source**

| SpectraX LED<br>Excitation filter<br>Beam splitter | Violet<br>390/18nm<br>HCBS416 | Violet<br>390/18nm<br>T495LPXR | Violet<br>390/18nm<br>HCBS520 | Blue<br>438/24nm<br>HCBS458  | Cyan<br>480/20nm<br>T495LPXR |
|----------------------------------------------------|-------------------------------|--------------------------------|-------------------------------|------------------------------|------------------------------|
| 10%                                                | 2.05                          | 2.10                           | 1.95                          | 3.75                         | 1.76                         |
| 20%                                                | 3.83                          | 3.92                           | 3.74                          | 6.84                         | 3.57                         |
| 30%                                                | 5.41                          | 5.53                           | 5.32                          | 9.46                         | 5.15                         |
| 40%                                                | 6.87                          | 7.03                           | 6.79                          | 11.92                        | 6.59                         |
| 50%                                                | 8.16                          | 8.35                           | 8.08                          | 14.04                        | 7.83                         |
| 60%                                                | 9.39                          | 9.62                           | 9.30                          | 16.03                        | 8.96                         |
| 70%                                                | 10.47                         | 10.73                          | 10.32                         | 17.77                        | 9.96                         |
| 80%                                                | 11.50                         | 11.80                          | 11.33                         | 19.44                        | 10.89                        |
| 90%                                                | 12.43                         | 12.77                          | 12.22                         | 20.93                        | 11.75                        |
| 100%                                               | 13.34                         | 13.75                          | 13.08                         | 22.40                        | 12.57                        |
|                                                    |                               |                                |                               |                              |                              |
| SpectraX LED<br>Excitation filter<br>Beam splitter | Cyan<br>488/6nm<br>T495LPXR   | Cyan<br>488/6nm<br>HCBS660     | Cyan<br>494/41nm<br>HCBS660   | Cyan<br>480/20nm<br>HCBS660  | Teal<br>504/12nm<br>HCBS520  |
| 10%                                                | 1.38                          | 1.41                           | 2.55                          | 1.82                         | 0.42                         |
| 20%                                                | 2.47                          | 2.51                           | 4.71                          | 3.59                         | 0.84                         |
| 30%                                                | 3.32                          | 3.36                           | 6.49                          | 5.14                         | 1.21                         |
| 40%                                                | 4.03                          | 4.06                           | 8.07                          | 6.54                         | 1.54                         |
| 50%                                                | 4.60                          | 4.64                           | 9.39                          | 7.74                         | 1.82                         |
| 60%                                                | 5.11                          | 5.15                           | 10.63                         | 8.84                         | 2.09                         |
| 70%                                                | 5.55                          | 5.59                           | 11.68                         | 9.80                         | 2.31                         |
| 80%                                                | 5.95                          | 6.00                           | 12.67                         | 10.72                        | 2.53                         |
| 90%                                                | 6.30                          | 6.36                           | 13.54                         | 11.52                        | 2.73                         |
| 100%                                               | 6.64                          | 6.70                           | 14.40                         | 12.28                        | 2.91                         |
|                                                    |                               |                                |                               |                              |                              |
| SpectraX LED<br>Excitation filter<br>Beam splitter | Green<br>542/20nm<br>ST562    | Green<br>546/10nm<br>ST560     | Green<br>561/4nm<br>HCBS573   | Green<br>600/14nm<br>HCBS624 | Green<br>605/15<br>HCBS660   |
| 10%                                                | 2.00                          | 1.24                           | 0.71                          | 0.76                         | 0.48                         |
| 20%                                                | 4.22                          | 2.54                           | 1.43                          | 1.57                         | 1.02                         |
| 30%                                                | 6.19                          | 3.70                           | 2.08                          | 2.30                         | 1.51                         |
| 40%                                                | 8.09                          | 4.83                           | 2.72                          | 3.02                         | 1.99                         |
| 50%                                                | 9.79                          | 5.84                           | 3.30                          | 3.67                         | 2.44                         |
| 60%                                                | 11.41                         | 6.83                           | 3.88                          | 4.33                         | 2.88                         |
| 70%                                                | 12.85                         | 7.71                           | 4.41                          | 4.94                         | 3.28                         |
| 80%                                                | 14.27                         | 8.61                           | 4.95                          | 5.56                         | 3.70                         |
| 90%                                                | 15.56                         | 9.37                           | 5.46                          | 6.15                         | 4.10                         |
| 100%                                               | 16.82                         | 10.15                          | 5.98                          | 6.86                         | 4.50                         |

Light power at the sample plane using a "Lumencore Spectra X Light Engine" fluorescence lightsource and a Plan Fluor NA 1.3 40x oil immersion objective. Different combinations of excitation filters and beam splitters at different light intensity settings were tested. Values are given in  $[\text{W cm}^{-2}]$ . The spectrum for each LED-filterset combination can be found in Figure S5.
