# Supplementary material
Source: publisher figshare collection journal article supplement (https://gsajournals.figshare.com/articles/dataset/_/13048073)
Supplement: Supplementary file 12 [file 1]

**Figure S4: The real exposure time is significantly longer than the set exposure time**

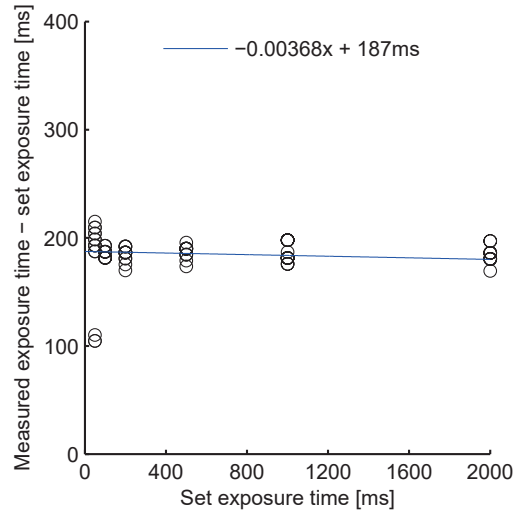

The actual time the sample is exposed to light was measured using a self made device. Different exposure times were set in the microscope control software. The actual exposure time was measured. For each exposure time the measurement was repeated at least five times. The difference between the measured exposure time and the set exposure time were calculated and plotted against the set exposure times. A linear function was fitted to the data. The slope of the function is near zero, indicating that the measured hardware delay is independent of the set exposure time. Therefore the intercept of the linear function indicated that the hardware delay in our setup is  $\sim 187$  ms.
