# Supplementary material
Source: publisher figshare collection journal article supplement (https://gsajournals.figshare.com/articles/dataset/_/13048073)
Supplement: Supplementary file 13 [file 1]

**Figure S10: Sensitivity of *S. cerevisiae* to blue light (438/24 nm) of different intensity**

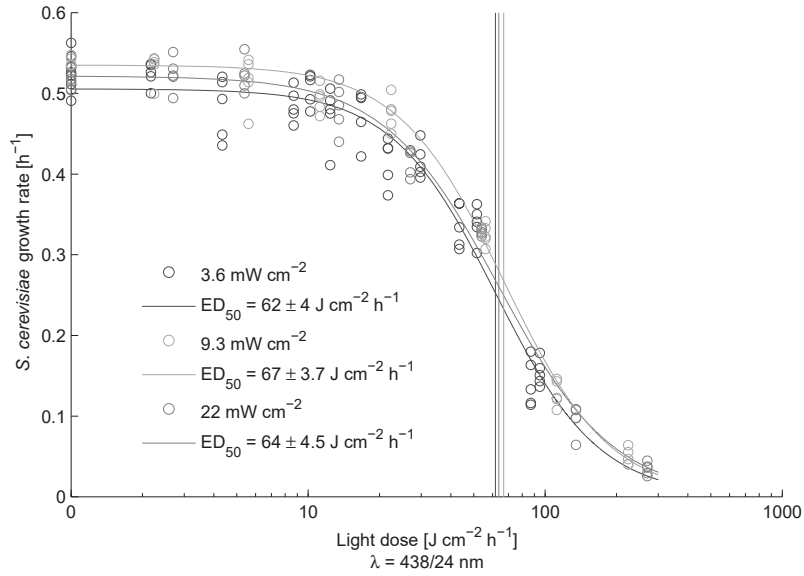

Cells were illuminated with fluorescence excitation light at the indicated intensity every five minutes for 495 minutes. The light dose was altered by changing the exposure time, while keeping the light intensity and imaging interval constant for a given dose-response curve measurement. Each point represents a single measurement. Line indicate fit of the sigmoidal model. ED<sub>50</sub>-values are indicated by vertical lines. Model fit parameters are given with  $\pm$  95% confidence interval.
