# Supplementary material
Source: publisher figshare collection journal article supplement (https://gsajournals.figshare.com/articles/dataset/_/13048073)
Supplement: Supplementary file 15 [file 1]

Figure S8: Sensitivity of *S. pombe* to light of different wavelengths

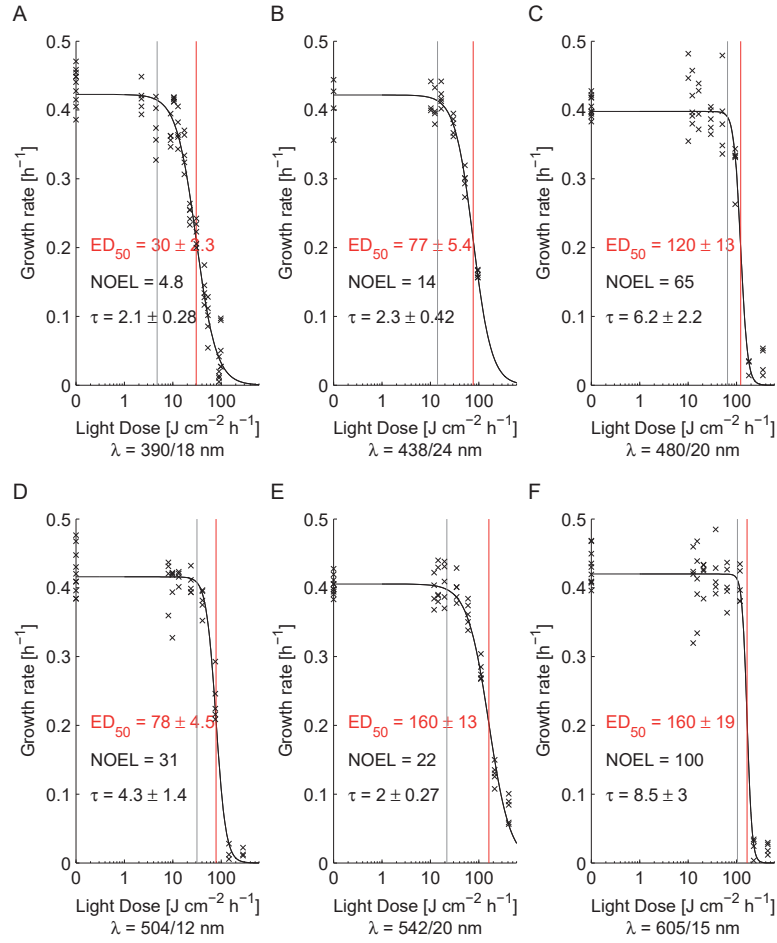

A: 390/18 nm, B: 438/24 nm, C: 480/20 nm, D: 504/12 nm, E: 542/20 nm, F: 605/15 nm. Cells were illuminated with fluorescence excitation light every five minutes for 495 minutes. The light dose was altered by changing the exposure time, while keeping the light intensity constant (see Table S3). Each point represents a single measurement. Line indicate fit of the sigmoidal model.  $\text{ED}_{50}$ -values and NOEL are indicated by vertical lines and are given in  $\text{J cm}^{-2} \text{h}^{-1}$ . Model fit parameters are given with  $\pm 95\%$  confidence interval.
