# Supplementary material
Source: publisher figshare collection journal article supplement (https://gsajournals.figshare.com/articles/dataset/_/13048073)
Supplement: Supplementary file 16 [file 1]

**Table S7: Primers used in this study**

| Name    | Target        | Purpose               | Direction | Sequence                                                           |
|---------|---------------|-----------------------|-----------|--------------------------------------------------------------------|
| FRO740  | pFA6 cassette | Vph1-tagging          | Fwd       | 5'-GGAAGTCGCTGTTGCTAGTGCAAGCTCTTCCGCTTCAAGC'ggtgacggctggttta-3'    |
| FRO3322 | pFA6 cassette | Vph1-tagging/knockout | Rev       | 5'-AGTACTTAATGT'TTCGCTTTT'TTAAAGTCCTCAAAATactggatggcggcgttag-3'    |
| FRO3544 | pFA6 cassette | Cdc12-tagging         | Fwd       | 5'-GCAAGGTCAAAAAGCT'TGCAAGTAAAAAATCCCATTTTAAAAggtgacggctggttta-3'  |
| FRO3545 | pFA6 cassette | Cdc12-tagging         | Rev       | 5'-TTGAAAT'TGACGAGACAAAAGAGGAAGACATTAATTAATCAactggatggcggcgttag-3' |
| FRO732  | pFA6 cassette | Whi5-tagging          | Fwd       | 5'-CGAAACGGAGCCCGAGTCGGATACCGAAGTGGGAGACGTCTggtgacggctggttta-3'    |
| FRO3198 | pFA6 cassette | Whi5-tagging          | Rev       | 5'-CTAACTCCGAGATTGCGGAGAAAAAATCGTACTACCAACAactggatggcggcgttag-3'   |
| FRO3356 | Vph1          | colony PCR            | Rev       | 5'-CGTGGGTTAGAGATATTAGTATTTCG-3'                                   |
| FRO3323 | Vph1          | colony PCR            | Fwd       | 5'-TGGATT'TAGAGGATTTGTGG-3'                                        |
| FRO3358 | Cdc12         | colony PCR            | Fwd       | 5'-GGGACTTGTGAAAATCG-3'                                            |
| FRO3359 | Cdc12         | colony PCR            | Rev       | 5'-TACGCAATAGGTACACAGC-3'                                          |
| FRO3357 | KanMX         | colony PCR            | Fwd       | 5'-ATACTAACGCCGCCATC-3'                                            |
| FRO3560 | KanMX         | colony PCR            | Rev       | 5'-CTGAGAAAGCAACCTGACC-3'                                          |
