# Supplementary material
Source: publisher figshare collection journal article supplement (https://gsajournals.figshare.com/articles/dataset/_/13048073)
Supplement: Supplementary file 19 [file 1]

**Table S3: Excitation filter / beam splitter combinations used for photomorbidity measurements.**

| Excitation filter     | Beam splitter | SpectraX LED | SpectraX power                   |
|-----------------------|---------------|--------------|----------------------------------|
| Single color toxicity |               |              |                                  |
| 390/18 nm             | HC-BS 520     | violet       | 20 % (3.74 W cm <sup>-2</sup> )  |
| 438/24 nm             | HC-BS 458     | blue         | 10 % (3.64 W cm <sup>-2</sup> )  |
| 480/20 nm             | T495 LPXR     | cyan         | 20 % (3.57 W cm <sup>-2</sup> )  |
| 504/12 nm             | HC-BS 520     | teal         | 100 % (2.91 W cm <sup>-2</sup> ) |
| 542/20 nm             | HC-BS 562     | green        | 20 % (4.22 W cm <sup>-2</sup> )  |
| 605/15 nm             | HC-BS 660     | green        | 100 % (4.50 W cm <sup>-2</sup> ) |
| Intensity comparison  |               |              |                                  |
| 438/24 nm             | HC-BS 458     | blue         | 10 % (3.62 W cm <sup>-2</sup> )  |
| 438/24 nm             | HC-BS 458     | blue         | 30 % (9.33 W cm <sup>-2</sup> )  |
| 438/24 nm             | HC-BS 458     | blue         | 100 % (22.4 W cm <sup>-2</sup> ) |
| Bandwidth comparison  |               |              |                                  |
| 480/20 nm             | HC-BS 660     | cyan         | 20 % (3.72 W cm <sup>-2</sup> )  |
| 488/6 nm              | HC-BS 660     | cyan         | 34 % (3.69 W cm <sup>-2</sup> )  |
| 494/41 nm             | HC-BS 660     | cyan         | 15 % (3.74 W cm <sup>-2</sup> )  |

The light power setting and measured intensity of the epifluorescence excitation light source are indicated.
