# Supplementary material
Source: publisher figshare collection journal article supplement (https://gsajournals.figshare.com/articles/dataset/_/13048073)
Supplement: Supplementary file 20 [file 1]

Figure S2: Growth rate of *S. pombe* in microfluidic device

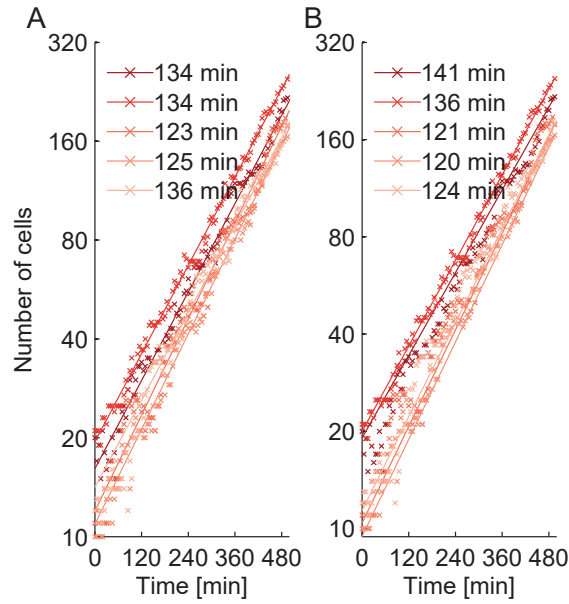

Reliable measurement of the growth rate in long-term time-lapse imaging can be obtained by counting the number of cells at the beginning and end of the observation period. *S. pombe* cells were loaded in the microfluidic device and grown in EMM+glucose in the absence of light stress. Brightfield images were captured in a five minute interval. Cells were counted in each frame and plotted against the experiment time in a semi-logarithmic plot. A: An exponential function ( $a * x^b$ ) was fitted to all data points and the growth rate calculated from the fit parameter  $b$ . The fitted growth function is indicated by red/orange lines. The doubling time was  $130 \pm 6$  min (mean  $\pm$  standard deviation). B: The growth rate was calculated from the number of cells in the first and last frame only. The calculated growth rate is indicated by red/orange lines. The doubling time was  $128 \pm 10$  min (mean  $\pm$  standard deviation).
