# Supplementary material
Source: publisher figshare collection journal article supplement (https://gsajournals.figshare.com/articles/dataset/_/13048073)
Supplement: Supplementary file 25 [file 1]

**Figure S14: Sensitivity of *S. cerevisiae* to light at different culturing temperatures**

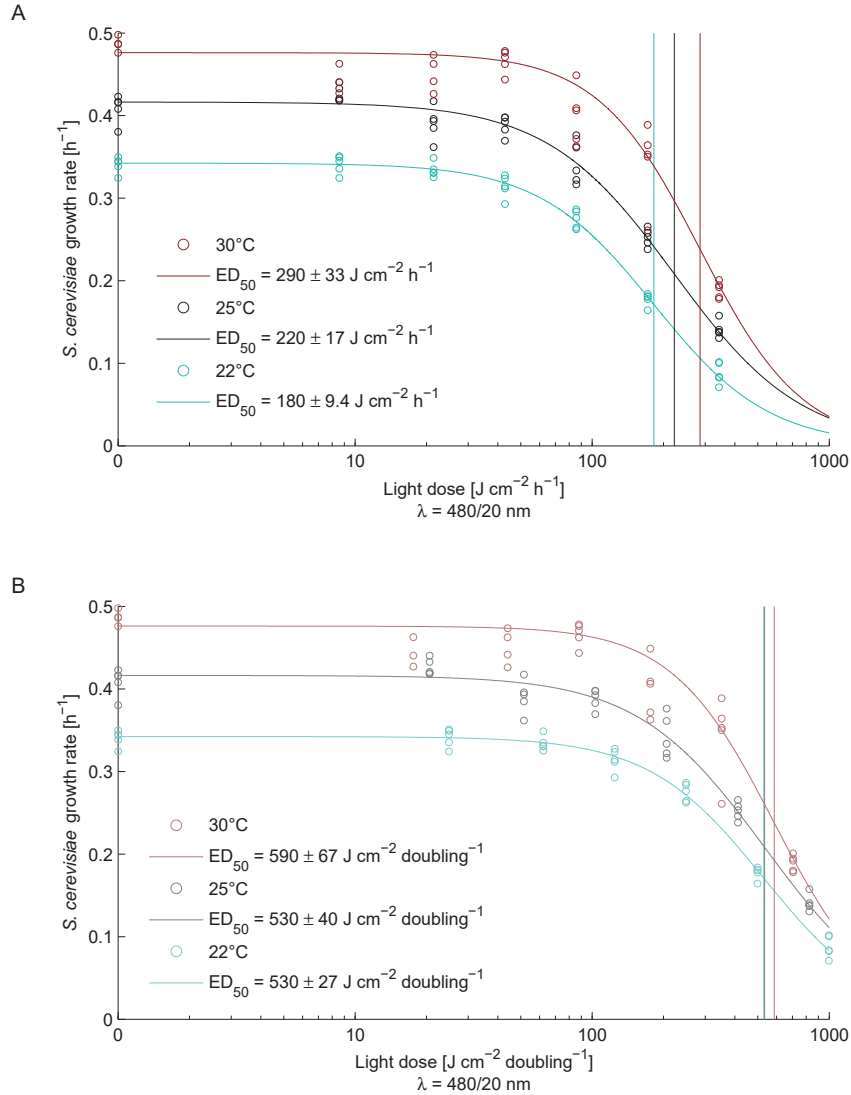

Sensitivity of *S. cerevisiae* to cyan light (480/20 nm) at different culturing temperatures. Cells were cultured at 22°C, 25°C or 30°C and illuminated with different light doses every five minutes for 495 minutes. The light dose was altered by changing the exposure time while keeping the light intensity constant. Each point represents a single measurement. A: The growth rate is plotted against the light dose per hour. Lines indicate fit of the sigmoidal model.  $\text{ED}_{50}$ -values are indicated by vertical lines. Model fit parameters are given with  $\pm$  confidence interval. B: The growth rate is plotted against the light dose per unstressed doubling time calculated based on the average doubling time in the respective growth temperature when cells were not exposed to fluorescence excitation light ( $0 \text{ J cm}^{-2} \text{h}^{-1}$ ). Line indicate fit of the sigmoidal model.  $\text{ED}_{50}$ -values are indicated by vertical lines. Model fit parameters are given with  $\pm$  95% confidence interval.
