# Supplementary material
Source: publisher figshare collection journal article supplement (https://gsajournals.figshare.com/articles/dataset/_/13048073)
Supplement: Supplementary file 26 [file 1]

**Table S8: Plasmids used in this study**

| Name    | Backbone       | Insert        | Source       | Addgene |
|---------|----------------|---------------|--------------|---------|
| FRP265  | pFA6a-link-Kan | mTFP1         | this study   | #159301 |
| FRP935  | pFA6a-link-Kan | mAmetrine     | this study   | #159302 |
| FRP322  | pFA6a-link-Kan | CitrineA206K  | this study   | #159303 |
| FRP266  | pFA6a-link-Kan | mKate2        | this study   | #159304 |
| FRP272  | pFA6a-link-Kan | sfGFP         | <sup>a</sup> | #159305 |
| FRP1931 | pFA6a-link-Kan | mRuby2        | this study   | #159306 |
| FRP1864 | pFA6a-link-Kan | tdKO $\kappa$ | this study   | #159307 |
| FRP1999 | pFA6a-link-Kan | mCardinal     | this study   | #159308 |
| FRP2000 | pFA6a-link-Kan | mNeptune2     | this study   | #159309 |
| FRP1975 | pFA6a-link-Kan | mNeongreen    | this study   | #159310 |
| FRP2002 | pFA6a-link-Kan | mTurquoise2   | this study   | #159311 |
| FRP2006 | pFA6a-link-Kan | eGFP          | <sup>b</sup> | #44900  |
| FRP2008 | pFA6a-link-Kan | mKO $\kappa$  | this study   | #159312 |
| FRP2010 | pFA6a-link-Kan | tSapphire     | this study   | #159313 |

<sup>a</sup> Roberts, T. M. et al. "Identification and characterisation of a pH-stable GFP", Sci. Rep. 6, DOI: 10.1038/srep28166 (2016)

<sup>b</sup> Lee, S., Lim, W. A. & Thorn, K. S. "Improved blue, green, and red fluorescent protein tagging vectors for *S. cerevisiae*", PloS ONE 8, DOI: 10.1371/journal.pone.0067902 (2013)
