# Supplementary material
Source: publisher figshare collection journal article supplement (https://gsajournals.figshare.com/articles/dataset/_/13048073)
Supplement: Supplementary file 27 [file 1]

**Figure S3: Definition of the light dose per hour in a time-lapse microscopy experiment**

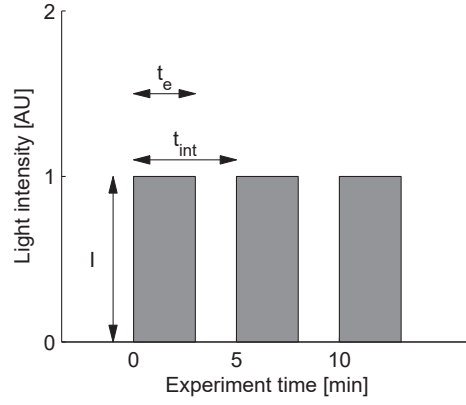

The different ways light exposure in a time-lapse microscopy experiment contribute to the overall light dose. The light dose per hour (LD) is determined by the excitation light intensity ( $I$ ), the exposure time ( $t_e$ ) and the interval time between images ( $t_{int}$ ).
