# Supplementary material
Source: publisher figshare collection journal article supplement (https://gsajournals.figshare.com/articles/dataset/_/13048073)
Supplement: Supplementary file 28 [file 1]

**Table S5: Light power of pulsed epifluorescence light source with 60x objective**

| SpectraX Teal LED | Power [W cm <sup>-2</sup> ] |
|-------------------|-----------------------------|
| 10%               | 0.91                        |
| 20%               | 2.06                        |
| 30%               | 3.05                        |
| 40%               | 3.95                        |
| 50%               | 4.71                        |
| 60%               | 5.41                        |
| 70%               | 6.03                        |
| 80%               | 6.61                        |
| 90%               | 7.13                        |
| 100%              | 7.63                        |

Light power at the sample plane using a "Lumencore Spectra X Light Engine" fluorescence lightsource and a Plan Apo VC NA 1.4 60x oil immersion objective. The teal LED of the lightsource combined with a 504/12nm excitation filter and a HCBS520 beam splitter was measured at different light intensity settings.
