# Supplementary material
Source: publisher figshare collection journal article supplement (https://gsajournals.figshare.com/articles/dataset/_/13048073)
Supplement: Supplementary file 29 [file 1]

**Figure S11: Sensitivity of *S. cerevisiae* to cyan light of different bandwidth**

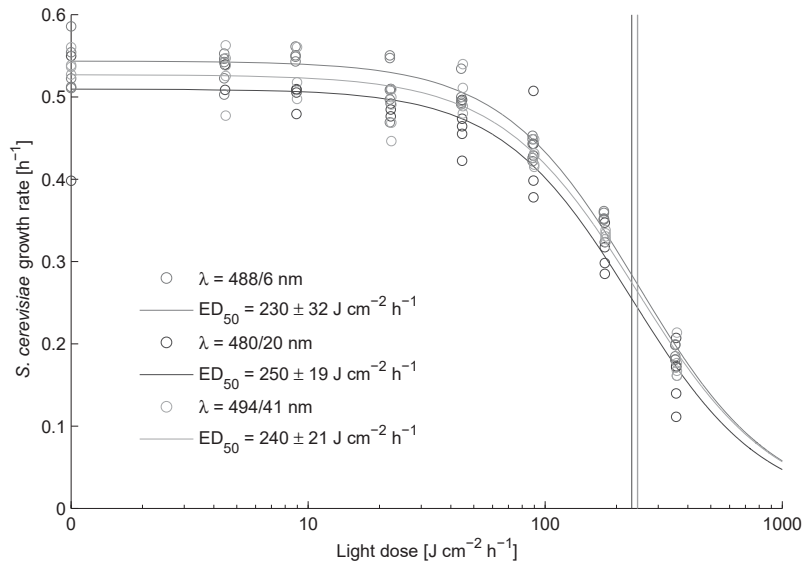

Cells were illuminated with the indicated bandwidth at the same light intensity every five minutes for 495 minutes. The light dose was altered by changing the exposure time. Each point represents a single measurement. Line indicate fit of the sigmoidal model.  $ED_{50}$ -values are indicated by vertical lines. Model fit parameters are given with  $\pm 95\%$  confidence interval.
