# Supplementary material
Source: publisher figshare collection journal article supplement (https://gsajournals.figshare.com/articles/dataset/_/13048073)
Supplement: Supplementary file 30 [file 1]

**Figure S19: Background, brightness and SNR of *S. cerevisiae* strains tagged with mKate2**

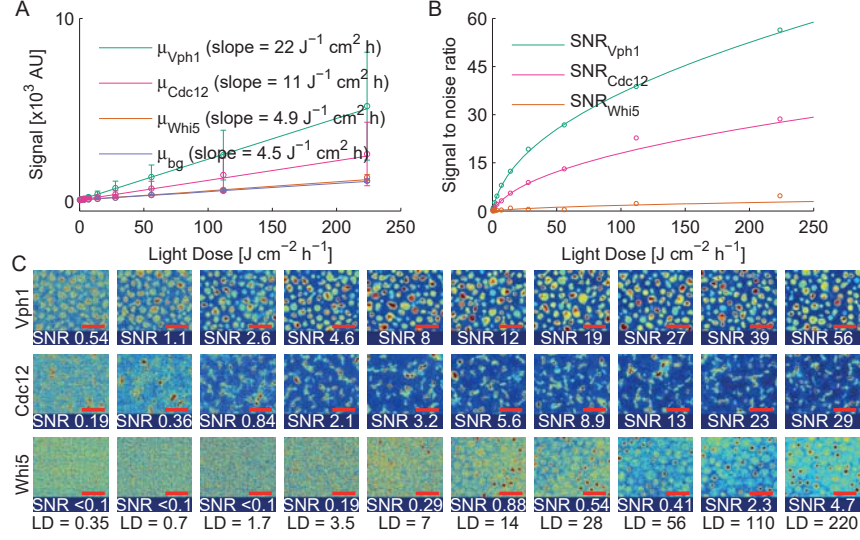

A: Total fluorescence of strains tagged with mKate2 is plotted against the light dose (based on a measurement with 5 min interval time). Every point indicates a measurement (mean  $\pm$  standard deviation are shown). The total fluorescence is linearly correlated with the light dose. The *in vivo* brightness is obtained by subtracting the background signal ( $\mu_{bg}$ ) from total signal ( $\mu_{Vph1}$ ,  $\mu_{Cdc12}$  or  $\mu_{Whi5}$ ). The resulting slopes of the linear functions depend on the abundance of the tagged protein and the brightness of the fluorescent protein. B: Signal-to-noise ratio for strains tagged with mKate2 at different light doses. C: False colored fluorescence images of cells expressing different mKate2 fusion proteins at different light doses. Images are contrast enhanced by stretching the histogram between 1% of the highest and lowest pixel values. SNR values were calculated for each image and are displayed inside the corresponding images. Pictures correspond to data points in Panel A & B and light doses are shown below the images. Scale bars represent  $10 \mu\text{m}$ .
