# Supplementary material
Source: publisher figshare collection journal article supplement (https://gsajournals.figshare.com/articles/dataset/_/13048073)
Supplement: Supplementary file 32 [file 1]

**Figure S12: Sensitivity of *S. cerevisiae* to light administered in constant wave and pulsed illumination mode**

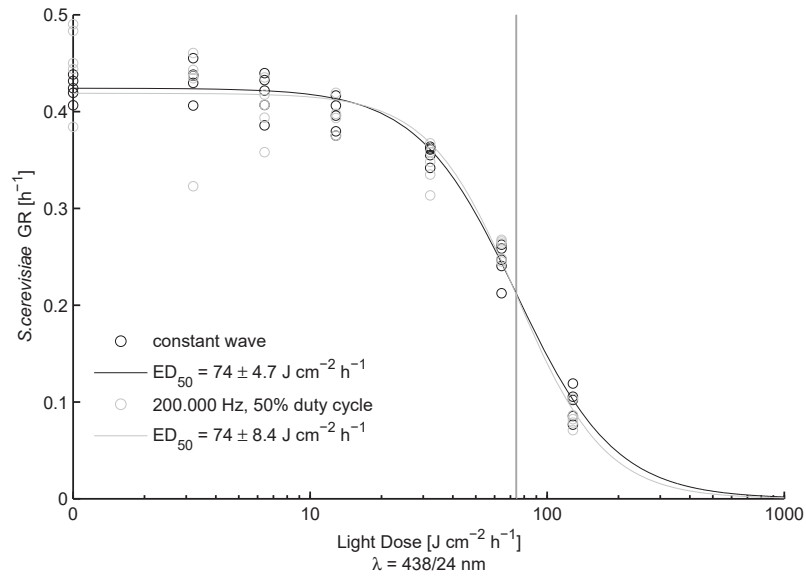

Sensitivity of *S. cerevisiae* to blue light (438/24 nm) in constant wave and pulsed illumination (200.000 Hz, 50% duty cycle) mode of the same average intensity ( $5.35 \text{ W cm}^{-2}$ ). Cells were illuminated with fluorescence excitation light every five minutes for 495 minutes. The light dose was altered by changing the exposure time, while keeping the light intensity constant for a given dose-response curve measurement. Each point represents a single measurement. Line indicate fit of the sigmoidal model.  $ED_{50}$ -values are indicated by vertical lines. Model fit parameters are given with  $\pm 95\%$  confidence interval.
