# Supplementary material
Source: publisher figshare collection journal article supplement (https://gsajournals.figshare.com/articles/dataset/_/13048073)
Supplement: Supplementary file 33 [file 1]

**Table S4: Light power of pulsed epifluorescence light source**

| Omicron LED Hub<br>455nm LED | Constant wave<br>Power [ $\text{W cm}^{-2}$ ] | 200.000 Hz<br>50% duty cycle<br>Power [ $\text{W cm}^{-2}$ ] |
|------------------------------|-----------------------------------------------|--------------------------------------------------------------|
| 10%                          | 2.29                                          | 0.07                                                         |
| 20%                          | 4.62                                          | 0.81                                                         |
| 23.2%                        | 5.35                                          | -                                                            |
| 30%                          | 6.90                                          | 1.45                                                         |
| 40%                          | 9.16                                          | 2.06                                                         |
| 50%                          | 11.43                                         | 2.65                                                         |
| 60%                          | 13.66                                         | 3.23                                                         |
| 70%                          | 15.88                                         | 3.79                                                         |
| 80%                          | 18.12                                         | 4.34                                                         |
| 90%                          | 20.32                                         | 4.85                                                         |
| 100%                         | 22.51                                         | 5.35                                                         |

Light power at the sample plane using a "Omicron LED Hub"  
(Omicron-Laserage Laserprodukte GmbH, Rodgau-Dudenhofen, Germany)  
fluorescence lightsource and a Plan Fluor NA 1.3 40x oil immersion objective.  
The 455 nm LED of the lightsource combined with a 438/24nm excitation  
filter and a T495LPXR beam splitter was measured at different light intensity  
settings. The light intensity at 23.2% in constant wave mode is equivalent to  
100% in pulsed illumination mode, and was used to compare photosensitivity  
(see Figure S12)
