# Supplementary material
Source: publisher figshare collection journal article supplement (https://gsajournals.figshare.com/articles/dataset/_/13048073)
Supplement: Supplementary file 34 [file 1]

**Table S6: Excitation filter / beam splitter combinations used for measurement of the SNR**

| Fluorescent protein | Excitation filter | Beam splitter | Emission filter | SpectraX LED | SpectraX power |
|---------------------|-------------------|---------------|-----------------|--------------|----------------|
| tSapphire           | 390/18 nm         | T495 LPXR     | 525/50 nm       | violet       | 15%            |
| mAmetrine           | 438/24 nm         | T495 LPXR     | 525/50 nm       | blue         | 15%            |
| mTFP1               | 438/24 nm         | HC-BS 458     | 480/17 nm       | blue         | 8%             |
| mTurquoise2         | 438/24 nm         | HC-BS 458     | 480/17 nm       | blue         | 8%             |
| sfGFP               | 488/6 nm          | T495 LPXR     | 525/50 nm       | cyan         | 25%            |
| eGFP                | 488/6 nm          | T495 LPXR     | 525/50 nm       | cyan         | 25%            |
| mNeonGreen          | 488/6 nm          | T495 LPXR     | 525/50 nm       | cyan         | 25%            |
| mNeonGreen          | 504/12 nm         | HC-BS 520     | 542/22 nm       | teal         | 100%           |
| CitrineA206K        | 504/12 nm         | HC-BS 520     | 542/22 nm       | teal         | 100%           |
| mRuby2              | 561/4 nm          | HC-BS 573     | 600/32 nm       | green        | 42%            |
| tdKO $\kappa$       | 546/10 nm         | HC-BS 560     | 577/25 nm       | green        | 23%            |
| mKO $\kappa$        | 546/10 nm         | HC-BS 560     | 577/25 nm       | green        | 23%            |
| mKate2              | 600/14 nm         | HC-BS 624     | 655/40 nm       | green        | 38%            |
| mCardinal           | 600/14 nm         | HC-BS 624     | 655/40 nm       | green        | 38%            |
| mNeptune2           | 600/14 nm         | HC-BS 624     | 655/40 nm       | green        | 38%            |

The light power setting of the epifluorescence excitation light source was adjusted so that the light intensity was 2.91 W cm<sup>-2</sup> for all measurements.
